# Supplementary material for: Genome-wide investigation of calcium-dependent protein kinase gene family in pineapple: evolution and expression profiles during development and stress
Source: BMC Genomics. 2020 Jan 23;21:72. doi: 10.1186/s12864-020-6501-8 (PMC6979071; doi:10.1186/s12864-020-6501-8)
Supplement: Supplementary file 4 — Additional file 4: Table S1. Characteristics of CPKs in pineapple [file 12864_2020_6501_MOESM4_ESM.xlsx]

## Sheet: Sheet1
Table S1. Characteristics of CPKs in pineapple
Gene name	Gene ID	ORF length	Amino acid	MW (kDa)	pI	N-terminal	N-Myristoylation	EF hands	Group
AcoCPK1	Aco003229.1	1506	501	56.096	5.22	MNQSGPPH	N	4	I
AcoCPK2	Aco003461.1	1653	550	61.356	5.62	MGNCCSAR	Y	4	III
AcoCPK3	Aco005141.1	1698	565	62.553	5.42	MGNTCVGP	N	4	I
AcoCPK4	Aco006066.1	1590	529	59.598	6.03	MGSRTSRH	Y	4	II
AcoCPK5	Aco007047.1	1695	564	62.915	5.9	MGNCCRSP	N	4	III
AcoCPK6	Aco008755.1	1242	413	45.852	4.91	MHHLAGHP	N	4	I
AcoCPK7	Aco009035.1	1560	519	58.062	8.02	MATIKGQY	N	4	II
AcoCPK8	Aco009208.1	1641	546	59.91	5.37	MGNTCRGS	N	4	I
AcoCPK9	Aco011406.1	1506	501	56.306	5.69	MSSKEAPI	N	4	III
AcoCPK10	Aco011911.1	1671	556	61.695	5.83	MGNTCRGS	N	4	I
AcoCPK11	Aco011994.1	1569	522	58.229	5.81	MGQCLTKT	Y	4	II
AcoCPK12	Aco015726.1	1617	538	60.415	7.67	MGNCYSNS	Y	4	IV
AcoCPK13	Aco017451.1	1737	578	65.234	5.79	MGNSSCAC	Y	4	III
AcoCPK14	Aco022369.1	1653	550	61.48	7.25	MGNCCATP	N	4	III
AcoCPK15	Aco022569.1	1656	551	61.272	8.25	MGNCCASP	N	4	III
AcoCPK16	Aco025773.1	1551	516	57.286	5.73	MGNCCSSA	Y	4	II
AcoCPK17	Aco027228.1	912	303	34.449	5.82	MFRDIVGS	N	4	IV
