# Supplementary material for: Genome-wide investigation of calcium-dependent protein kinase gene family in pineapple: evolution and expression profiles during development and stress
Source: BMC Genomics. 2020 Jan 23;21:72. doi: 10.1186/s12864-020-6501-8 (PMC6979071; doi:10.1186/s12864-020-6501-8)
Supplement: Supplementary file 5 — Additional file 5: TableS2. Synteny blocks of CPK genes within pineapple genome [file 12864_2020_6501_MOESM5_ESM.xlsx]

## Sheet: Sheet1
TableS2. Synteny blocks of CPK genes within pineapple genome
gene ID		gene name
gene1（pineapple）	gene2（pineapple）	gene1	gene2	Ka	Ks	Ka/Ks
Aco011911	Aco009208	AcoCPK10	AcoCPK8	0.1391	1.9607	0.0709441
Aco011994	Aco009035	AcoCPK11	AcoCPK7	0.2719	4.3855	0.0619998
Aco015726	Aco027228	AcoCPK12	AcoCPK17	0.1055	1.5213	0.0693486
Aco022369	Aco022569	AcoCPK14	AcoCPK15	0.0865	0.6746	0.128224
Aco003461	Aco011406	AcoCPK2	AcoCPK9	0.1625	2.1153	0.0768213
Aco005141	Aco008755	AcoCPK3	AcoCPK6	0.1066	2.0525	0.0519367
