# Supplementary material for: Genome-wide investigation of calcium-dependent protein kinase gene family in pineapple: evolution and expression profiles during development and stress
Source: BMC Genomics. 2020 Jan 23;21:72. doi: 10.1186/s12864-020-6501-8 (PMC6979071; doi:10.1186/s12864-020-6501-8)
Supplement: Supplementary file 8 — Additional file 8: Table S5. Expression profiles of the pineapple CPK genes in different tissues [file 12864_2020_6501_MOESM8_ESM.xlsx]

## Sheet: Sheet1
Table S7. The expression profiles of the pineapple CPK genes after cold treatment
	4℃_0h	4℃_2h	4℃_6h	4℃_12h	4℃_24h	4℃_48h
AcoCPK1	1.03482	3.92125	1.1338	2.70321	4.27089	4.79438
AcoCPK2	1.00621	1.54043	2.73959	2.89968	2.69826	11.4762
AcoCPK3	1.11042	4.7951	0.970358	1.69898	7.16101	5.49913
AcoCPK4	1.01347	2.56648	0.769174	0.0357866	0.0171082	0.036018
AcoCPK5	1.07795	5.67425	0.565596	0.154451	0.429093	0.954268
AcoCPK6	1.00148	4.35864	1.06213	0.991104	1.94512	1.60725
AcoCPK7	1.00161	0.66324	1.57156	1.74648	1.81762	3.40042
AcoCPK8	1.00689	1.94984	0.874387	2.16495	1.53897	2.96468
AcoCPK9	1.01772	6.80719	1.6333	0.0513122	0.114636	0.160645
AcoCPK10	1.00154	6.18611	1.16546	1.58811	1.51451	2.3467
AcoCPK11	1.00563	7.10526	1.14276	1.576	2.01926	4.58711
AcoCPK12	1.05249	0.548797	1.46112	1.70794	4.59812	9.15214
AcoCPK13	0	0	0	0	0	0
AcoCPK14	1.00385	4.17829	1.21507	2.69288	1.91165	3.43624
AcoCPK15	1.00337	0.203709	0.819286	0.701445	1.30938	2.72573
AcoCPK16	1.03031	8.25218	0.608093	0.0960208	0.187895	0.334501
AcoCPK17	1.01653	5.90391	1.64339	1.91512	3.19295	4.79449

## Sheet: Sheet2
Table S5 The expression profiles of the pineapple CPK genes in different tissues
gene_id	Ovule.S1	Ovule.S2	0vule.S3	Ovule.S4	0vule.S5	0vule.S6	0vule.S7	Sepal.S1	Sepal.S2	Sepal.S3	Sepal.S4	Stamen.S1	Stamen.S2	Stamen.S3	Stamen.S4	Stamen.S5	Petal.S1	Petal.S2	Petal.S3	Root	Flower	Leaf	fruit.S1	fruit.S2	fruit.S3	fruit.S4	fruit.S5	fruit.S6
Aco003229	54.7323	48.3189	49.3112	52.4788	50.4886	50.7139	52.0857	42.8929	42.8434	25.8164	25.9551	46.2543	31.9767	27.8871	28.6359	31.4772	28.7395	28.6054	6.35596	20.8665	12.1926	10.528	28.8419	52.495	58.0126	21.3413	21.8718	20
Aco003461	6.43718	6.50555	5.30427	7.25589	7.21603	6.17261	7.09468	5.25153	4.95328	5.73708	7.8969	12.0073	16.1474	11.0271	6.0043	163.611	3.98943	3.60404	15.0611	3.19208	143.015	140.06	2.11099	1.48754	1.54667	1.17019	1.26566	2.04754
Aco005141	9.88212	12.7111	7.27854	8.80615	10.3741	11.2007	17.5244	15.9974	15.6857	4.7731	4.68589	9.15903	6.69088	3.96217	6.04285	4.08615	3.58937	3.95649	34.4954	27.9216	3.7132	3.01007	11.6189	21.3483	24.3971	13.1886	21.4134	23.2148
Aco006066	97.8925	82.8883	65.921	67.9263	63.193	85.8416	71.2742	48.0033	56.0826	41.859	37.1644	41.616	41.2231	32.2435	39.5088	55.5135	45.2118	61.9501	89.6863	55.1355	61.7102	59.8867	41.8615	51.0689	57.3615	70.1313	91.6908	94.8668
Aco007047	114.169	81.6656	71.7354	86.1694	75.411	67.3773	56.9501	49.1848	45.1053	38.1051	34.7615	47.5319	59.2321	33.9206	29.0996	21.3755	32.9442	47.6881	73.7949	34.1382	47.6465	50.7601	30.326	29.2063	27.7108	23.1891	19.1872	11.4147
Aco008755	4.83296	5.26871	6.11656	4.94053	5.67933	5.16322	6.0713	3.08783	4.36766	7.9845	6.07312	9.80099	8.0127	4.50553	5.98087	37.9024	3.56877	8.9418	52.2054	6.17087	41.5304	38.7883	2.08564	0.910858	1.9051	1.22925	1.54401	5.41468
Aco009035	61.9058	59.004	58.2086	67.4297	61.5854	57.8353	49.4492	116.129	87.0568	103.926	105.97	58.2143	50.5072	45.9936	53.186	67.6739	55.7342	68.7183	95.1248	72.8855	70.9127	68.1164	49.7414	116.07	126.324	132.75	124.879	161.933
Aco009208	14.304	11.1349	11.6864	12.3147	15.3982	12.2428	11.8938	11.9176	10.8115	16.089	12.2657	28.911	48.4041	182.505	60.4288	54.9216	8.15781	14.1124	146.252	17.1051	60.213	57.0635	20.8629	14.6603	14.1827	18.0275	12.5391	32.1247
Aco011406	0.268039	0.089042	0.0770229	0.0389375	0.153955	0.197171	0.178061	0.0354029	0.192217	1.17699	3.13894	0.163829	0.0853484	0.0468768	0.0835505	24.2592	0.0618219	0.633749	8.24435	0.993263	81.904	74.097	0.745467	0.734798	0.715389	1.17637	1.13188	1.05485
Aco011911	46.9855	50.2537	48.4883	50.5163	50.2951	46.7454	60.1034	75.4939	84.7048	52.2491	50.8412	33.6375	36.8737	35.5948	40.5243	79.4205	37.0315	40.7082	79.8492	45.2161	65.0516	62.7386	39.5967	51.9328	62.6851	57.7475	64.7619	39.8591
Aco011994	4.88087	3.93466	3.42957	3.13589	3.33781	1.38254	3.14681	4.44454	13.3811	9.5866	7.18151	0.970998	2.36212	1.28844	2.28272	11.0984	3.05673	4.85663	15.9401	25.8438	6.05903	6.52271	7.09918	10.9645	13.0733	14.0491	14.4188	11.8932
Aco015726	46.371	44.6884	36.8019	40.1678	40.6971	35.0589	30.4575	36.2286	42.6086	39.1993	35.7255	28.012	39.3792	32.0522	38.2024	48.1615	28.0706	30.955	83.4168	68.9957	49.0339	48.5738	36.3832	43.3097	42.9375	32.12	33.9623	23.9796
Aco017451	14.2985	13.6517	11.6485	12.4514	12.1175	13.6576	11.0565	5.32989	7.27711	5.85654	5.96426	14.4492	14.4691	11.6706	14.0553	4.34081	6.10227	3.17017	4.99433	17.8291	1.44254	1.83889	7.88347	8.31878	13.387	7.16949	5.42945	4.3088
Aco022369	65.1658	59.3525	56.2044	61.8849	59.1133	79.7158	58.9736	55.1066	63.5906	48.1905	44.6861	55.6912	43.7991	45.3124	59.3254	63.1043	47.1207	44.1796	67.5035	41.5077	62.9141	59.5156	41.1705	67.5326	64.7719	55.8929	62.4595	50.1884
Aco022569	7.77736	8.57629	9.40703	8.47432	10.29	13.0602	11.4034	11.2795	11.4425	12.6478	11.9957	19.1488	13.2424	13.8455	14.466	41.6506	7.0242	11.2199	30.6072	19.8525	42.6076	36.4888	16.1365	15.2574	15.5189	12.9846	10.5947	20.7421
Aco025773	0	0.0120471	0	0.0310052	0	0	0.0312427	0.0338409	0.25642	4.70154	9.6503	0	0	0	0	67.0482	0	0.862429	24.9277	0	274.212	244.37	0.0456567	0	0	0	0	0
Aco027228	12.5092	12.9732	9.77604	10.4971	9.51775	13.3854	10.313	15.0701	16.2174	8.32597	8.43477	9.18082	7.63831	10.9183	9.6391	16.5498	8.07378	9.94063	17.0112	16.5349	14.7686	12.4551	16.5956	17.8746	18.3469	14.1494	16.5125	16.8549
