# Supplementary material for: Genome-wide investigation of calcium-dependent protein kinase gene family in pineapple: evolution and expression profiles during development and stress
Source: BMC Genomics. 2020 Jan 23;21:72. doi: 10.1186/s12864-020-6501-8 (PMC6979071; doi:10.1186/s12864-020-6501-8)
Supplement: Supplementary file 9 — Additional file 9: Table S6. cis-elememts in AcoCPKs promoters [file 12864_2020_6501_MOESM9_ESM.xlsx]

## Sheet: Sheet1
Table S6. cis-elememts in AcoCPKs promoters
Gene Name	Gene ID	ABRE	AuxRR-core	CGTCA-motif	EIRE	ERE	GARE-motif	GCC-box	HSE	LTR	MBS	TC-rich	TCA-element	TGA-element	W -box	WUN-motif
AcoCPK1	Aco003229.1			1							3	1	1
AcoCPK2	Aco003461.1	2		2					1	1	1	1		1
AcoCPK3	Aco005141.1	1				1	2			1	4	1	3		3
AcoCPK4	Aco006066.1			1			1		3		4	2	3	1
AcoCPK5	Aco007047.1					1					2	1	1		3
AcoCPK6	Aco008755.1	2		1			1				2	3	2
AcoCPK7	Aco009035.1						1	1	2		3		3		1
AcoCPK8	Aco009208.1	3		1		2			1	1	2	1	1		2
AcoCPK9	Aco011406.1			1			1		1	2	1	1	3
AcoCPK10	Aco011911.1		1	2		1			3	1	4	1			3
AcoCPK11	Aco011994.1		1	2					1	1	1	1	2	1		1
AcoCPK12	Aco015726.1	2		1	1	1			3		2	1	1		4
AcoCPK13	Aco017451.1				1	1			1		1		1	1	2
AcoCPK14	Aco022369.1			1		1					2		1		2
AcoCPK15	Aco022569.1	1		3		1	1		1		1	2	2		4
AcoCPK16	Aco025773.1								2	1	2	1	1
AcoCPK17	Aco027228.1					3		1	1	1					1
